# Supplementary material
Source: publisher figshare collection journal article supplement (https://gsajournals.figshare.com/articles/dataset/_/12494639)
Supplement: Supplementary file 2 [file 1]

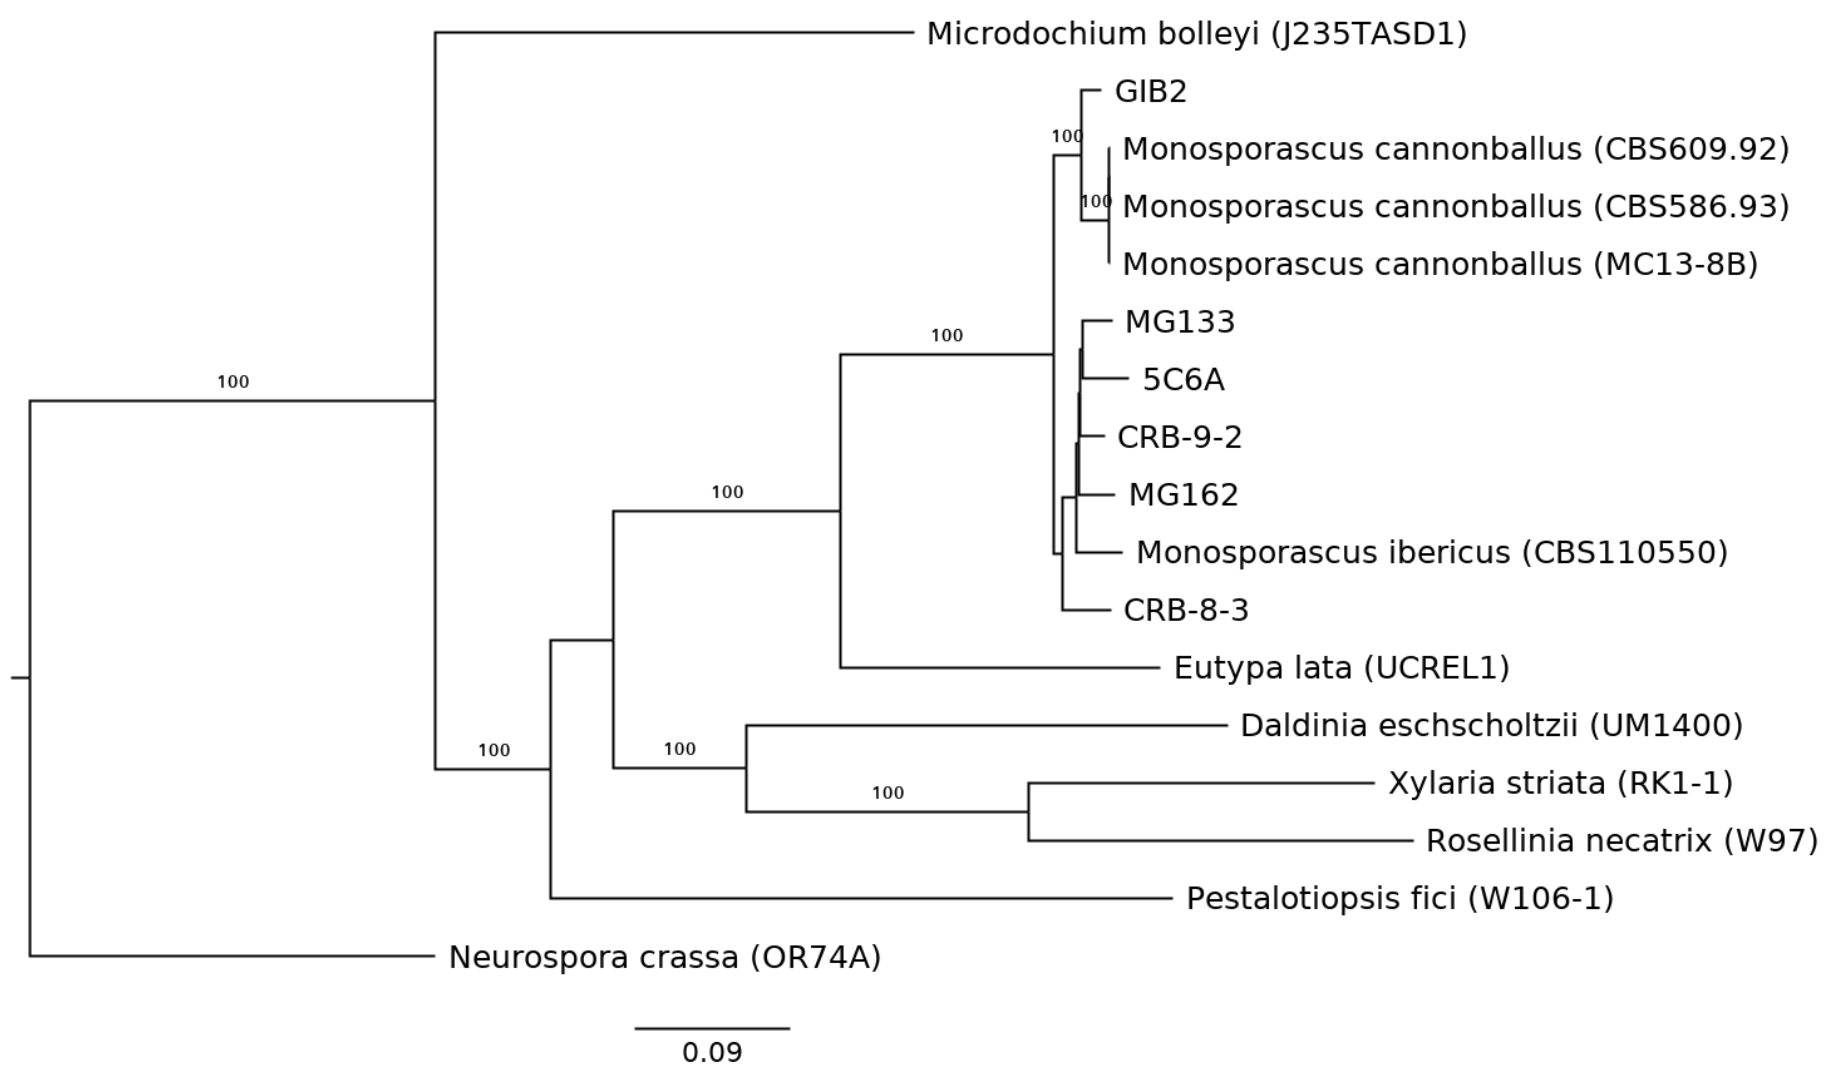

**Figure S1.** Five-gene maximum-likelihood tree. Bootstrap values (percent of 1000 replicates) are shown for branches with greater than 65% support. Note that among the non-*Monosporascus* Xylariales species examined *E. lata* is the most closely related to members of the genus *Monosporascus*.
